# Supplementary material for: Design, Synthesis, and Biological Evaluation of 5,6,7,8-Tetrahydrobenzo[4,5]thieno[2,3-d]pyrimidines as Microtubule Targeting Agents
Source: MDPI journal article supplement (doi:10.3390/molecules27010321), 2022-01-05
Supplement: s1 [file s1]

# Design, Synthesis, and Biological Evaluation of 5,6,7,8-Tetrahydrobenzo[4,5]thieno[2,3-*d*]pyrimidines as Microtubule Targeting Agents

Farhana Islam <sup>1</sup>, Arpit Doshi <sup>1</sup>, Andrew J. Robles <sup>2,3</sup>, Tasdique M. Quadery <sup>1</sup>, Xin Zhang <sup>1</sup>, Xilin Zhou <sup>1</sup>, Ernest Hamel <sup>4</sup>, Susan L. Mooberry <sup>2,3,\*</sup> and Aleem Gangjee <sup>1,\*</sup>

<sup>1</sup> Division of Medicinal Chemistry, Graduate School of Pharmaceutical Sciences, Duquesne University, 600 Forbes Avenue, Pittsburgh, PA 15282, USA; islamf@duq.edu (F.I.); doshia@duq.edu (A.D.); quaderyt@duq.edu (T.M.Q.); zhangx@duq.edu (X.Z.); zhoux@duq.edu (X.Z.)

<sup>2</sup> Department of Pharmacology, University of Texas Health Science Center at San Antonio, 7703 Floyd Curl Drive, San Antonio, TX 78229, USA; roblesa3@uthscsa.edu

<sup>3</sup> Mays Cancer Center, University of Texas Health Science Center at San Antonio, 7703 Floyd Curl Drive, San Antonio, TX 78229, USA

<sup>4</sup> Molecular Pharmacology Branch, Developmental Therapeutics Program, Frederick National Laboratory for Cancer Research, Division of Cancer Treatment and Diagnosis, National Cancer Institute, National Institutes of Health, Frederick, MD 21702, USA; hamele@dc37a.nci.nih.gov

\* Correspondence: mooberry@uthscsa.edu (S.L.M.); gangjee@duq.edu (A.G.)

## Supplementary Materials

Docking scores were measured using Schrödinger Maestro suite (Schrödinger, LLC, New York, NY, 2020-2).

**Table S1.** Docking scores.

|                   | Docking scores (kcal/mol) |
|-------------------|---------------------------|
| <b>1</b>          | -10.15                    |
| <b>2</b>          | -10.11                    |
| <b>3</b>          | -10.10                    |
| <b>4</b>          | -10.89                    |
| <b>5</b>          | -10.72                    |
| <b>6</b>          | -10.52                    |
| <b>7</b>          | -10.68                    |
| <b>8</b>          | -10.55                    |
| <b>9</b>          | -9.68                     |
| <b>10</b>         | -10.42                    |
| <b>11</b>         | -9.75                     |
| <b>12</b>         | -10.40                    |
| <b>13</b>         | -10.45                    |
| <b>14</b>         | -9.75                     |
| <b>Colchicine</b> | -11.02                    |

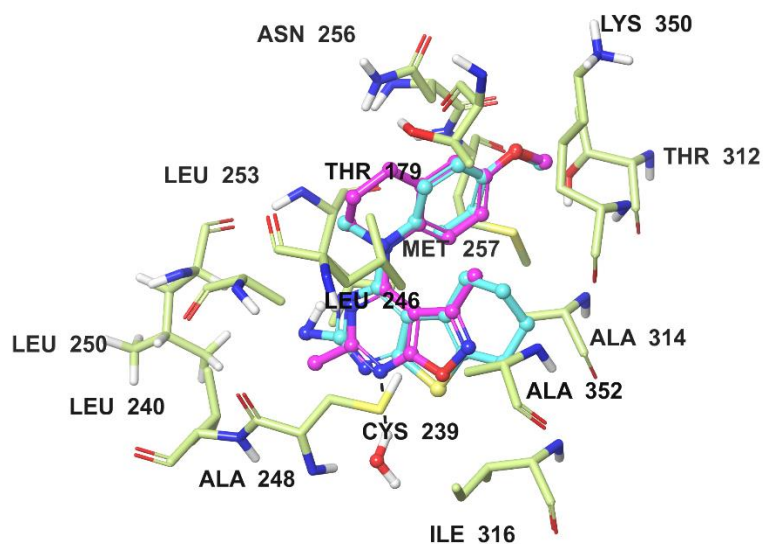

**Figure S1.** Superposition of 6BS2 pyrimidine ligand with compound **4**.
